# Supplementary material for: Gold nanoparticle catalyzed intramolecular C–S bond formation/C–H bond functionalization/cyclization cascades
Source: Royal Society of Chemistry journal article supplement (doi:10.1039/c5ra10885c), 2015-01-01

## **Supporting Information**

### **Gold nanoparticles catalyzed intramolecular C-S bond formation/ C-H bond functionalization/Cyclization Cascades**

Prasanta Gogoi,\*Bappi Paul, Sukanya Hazarika and Pranjit Barman

*Department of Chemistry, National Institute of Technology, Silchar-788010, Assam, India*

**\*Corresponding author**

E-mail: [prasantanits.11@gmail.com](mailto:prasantanits.11@gmail.com)

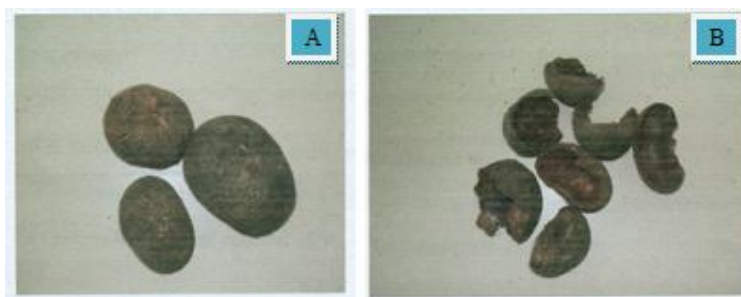

**Fig. 1**(A) *Kayea assamica* fruit (Before drying) (B) *Kayea assamica* fruit peel (After drying)

### Preparation of the fruit extract

*Kayea assamica* (sia nahor) fruits were used to make the aqueous extract. *K. assamica* fruit (Fig. 1A) weighing 5g were thoroughly washed in distilled water, cut into pieces and dried. After removal the peel (Fig. 1B) the dried were crushed into 100 ml sterile distilled water and filtered through Whatman No.1 filter paper (pore size 25  $\mu\text{m}$ ). The filtrate was further filtered through 0.6  $\mu\text{m}$  sized filters.

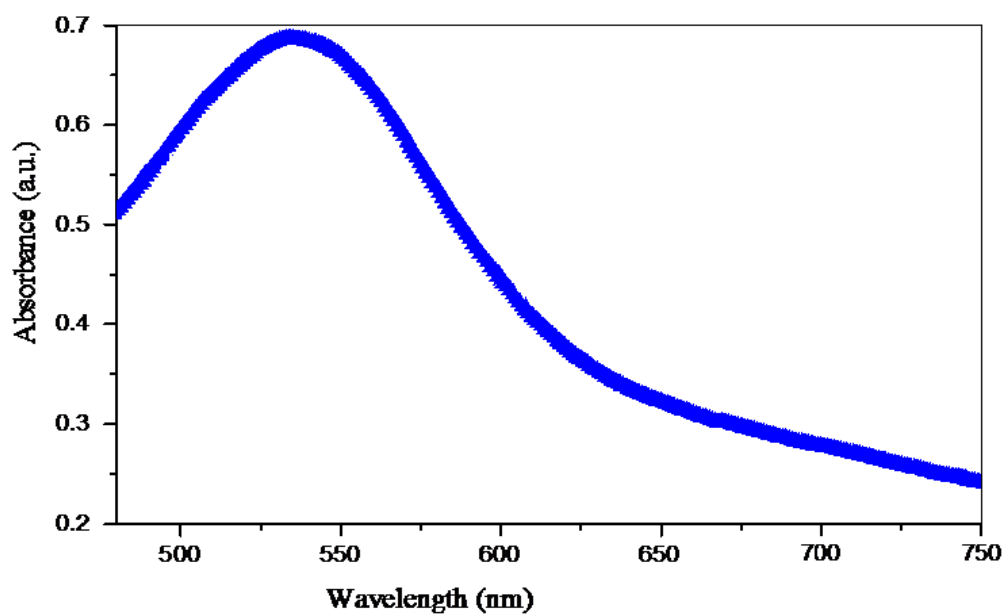

**Fig.6** UV-vis absorption spectra of Au-nano particles

## Typical procedure

### General

Gold (III) chloride hydrate ( $\text{HAuCl}_4 \cdot x\text{H}_2\text{O}$ ) 99.99% metal basis purchased from Sigma Aldrich. *Kayea assamica* fruits was collected from Lakhimpur, Assam, INDIA in the month of June–August 2013 and gently washed to remove dust. Melting points were recorded on a Reico melting point apparatus and were uncorrected. The UV–vis absorption spectrum was recorded on a Cary 100 Bio spectrophotometer ( $\lambda$ -max in nm) equipped with 1cm quartz cell.  $^1\text{H}$  and  $^{13}\text{C}$  Nuclear Magnetic Resonance spectra of pure compounds were acquired at 400 and 100 MHz respectively. All NMR samples were recorded in deuterated chloroform. Chemical shifts (ppm) were recorded with tetramethylsilane (TMS) as the internal reference standard. Elemental analyses were performed on a Flash 2000 Thermo Scientific instrument at NIT Silchar. The TEM characterizations were carried out at model no. CM-12 Philips TEM (IIT Kharagpur).

**N-Phenylbenzo[d]thiazol-2-amine (2a):** Yield 203 mg (90%). White solid, m.p. 160-161 °C,  $^1\text{H}$  NMR (400 MHz,  $\text{CDCl}_3$ )  $\delta$  9.10 (s, 1H), 8.03 (d,  $J$  = 8.4 Hz, 2H), 7.90 (d,  $J$  = 8.8 Hz, 2H), 7.72 (d,  $J$  = 8.2 Hz, 1H), 7.60-7.53 (m, 2H), 7.46-7.26 (m, 2H).  $^{13}\text{C}$  NMR (100 MHz,  $\text{CDCl}_3$ )  $\delta$  167.0, 151.0, 137.2, 131.3, 129.4, 128.9, 127.8, 127.4, 126.9, 124.1, 118.9; HRMS (ESI):  $\text{MH}^+$  Calcd for  $\text{C}_{13}\text{H}_{10}\text{N}_2\text{S}$  226.0564; Found 226.0563. Anal. Calcd for  $\text{C}_{13}\text{H}_{10}\text{N}_2\text{S}$ : C, 69.00; H, 4.45; N, 12.38. Found: C, 69.01; H, 4.45; N, 12.40.

**6-methyl-N-p-tolylbenzo[d]thiazol-2-amine (2b):** Yield 243 mg (96%). White solid, m.p. 227-228 °C,  $^1\text{H}$  NMR (400 MHz,  $\text{CDCl}_3$ )  $\delta$  8.65 (s, 1H), 7.63 (d,  $J$  = 8.0 Hz, 2H), 7.53-7.35 (m, 2H), 7.32-7.23 (m, 3H), 2.56 (s, 3H), 2.42 (s, 3H).  $^{13}\text{C}$  NMR (100 MHz,  $\text{CDCl}_3$ )  $\delta$  166.7, 155.2, 133.8, 132.1, 130.0, 129.2, 128.6, 127.6, 127.3, 123.5, 119.6, 25.5, 24.1. Anal. Calcd for  $\text{C}_{15}\text{H}_{14}\text{N}_2\text{S}$ : C, 70.83; H, 5.55; N, 11.01. Found: C, 70.88; H, 5.45; N, 11.00.

**6-chloro-N-(4-chlorophenyl)[d]thiazol-2-amine (2c):** Yield 264 mg (90%). White solid, m.p. 176-177 °C,  $^1\text{H}$  NMR (400 MHz,  $\text{CDCl}_3$ )  $\delta$  9.21 (s, 1H), 7.82 (s, 1H), 7.57 (d,  $J$  = 7.5 Hz, 1H), 7.43 (d,  $J$  = 7.7 Hz, 2H), 7.31-7.23 (m, 4H).  $^{13}\text{C}$  NMR (100 MHz,  $\text{CDCl}_3$ )  $\delta$  161.2,

150.4, 145.2, 137.5, 133.8, 133.6, 130.5, 127.4, 125.9, 125.7, 119.2; Anal.Calcd for  $C_{13}H_8Cl_2N_2S$ : C, 52.89; H, 2.73; N, 9.49. Found: C, 52.87; H, 2.77; N, 9.66.

**6-bromo-N-(4-bromophenyl)[d]thiazol-2-amine (2d):** Yield 330 mg (86%). White solid, m.p. 187-188°C,  $^1H$  NMR (400 MHz,  $CDCl_3$ )  $\delta$  9.09 (s, 1H), 8.14 (d,  $J = 8.4$  Hz, 1H), 7.90 (d,  $J = 7.8$  Hz, 1H), 7.77-7.62 (m, 3H), 7.54 (t,  $J = 7.7$  Hz, 1H), 7.42 (d,  $J = 7.8$  Hz, 1H);  $^{13}C$  NMR (100 MHz,  $CDCl_3$ )  $\delta$  163.1, 149.1, 137.0, 134.9, 134.5, 131.8, 131.2, 127.2, 127.0, 126.4, 120.1; HRMS (ESI):  $MH^+$  Calcd for  $C_{13}H_8Br_2N_2S$  381.8774; found 381.8770. Anal.Calcd for  $C_{13}H_8Br_2N_2S$ : C, 40.65; H, 2.10; N, 7.29. Found: C, 40.59; H, 2.15; N, 7.30.

**6-iodo-N-(4-iodophenyl)[d]thiazol-2-amine (2e):** Yield 406 mg (85%). White solid, m.p. 213-214 °C,  $^1H$  NMR (400 MHz,  $CDCl_3$ )  $\delta$  9.65 (s, 1H), 9.03(s, 1H), 9.03 (d,  $J = 8.0$  Hz, 1H), 7.86 (d,  $J = 7.2$  Hz, 1H), 7.57 (d,  $J = 7.5$  Hz, 2H), 7.39 (d,  $J = 7.5$  Hz, 2H);  $^{13}C$  NMR (100 MHz,  $CDCl_3$ )  $\delta$  162.2, 151.5, 134.1, 133.8, 131.4, 130.0, 127.6, 126.2, 125.7, 125.0, 119.3; Anal. Calcd for  $C_{13}H_8I_2N_2S$ : C, 32.66; H, 1.69; N, 5.86. Found: C, 32.71; H, 1.71; N, 5.82.

**N-p-tolylbenzo[d]thiazol-2-amine (2f):** Yield 216 mg (90%). White solid, m.p. 178-179 °C,  $^1H$  NMR (400 MHz,  $CDCl_3$ )  $\delta$  8.96 (s, 1H), 7.66 (d,  $J = 7.5$  Hz, 1H), 7.53 (d,  $J = 7.9$  Hz, 1H), 7.48 (t,  $J = 7.3$  Hz, 1H), 7.31 (d,  $J = 7.2$  Hz, 1H), 7.24 (d,  $J = 7.7$  Hz, 2H), 7.15 (d,  $J = 8.3$  Hz, 2H), 2.42 (s, 3H).  $^{13}C$  NMR (100 MHz,  $CDCl_3$ )  $\delta$  166.2, 152.2, 137.3, 134.2, 131.8, 129.2, 127.0, 125.7, 121.9, 120.5, 118.7, 21.43; Anal.Calcd for  $C_{14}H_{12}N_2S$ : C, 69.97; H, 5.03; N, 11.66. Found: C, 69.95; H, 5.07; N, 11.69.

**N-(4-chlorophenyl)benzo[d]thiazol-2-amine (2g):** Yield 202 mg (78%). White solid, m.p. 202-209 °C,  $^1H$  NMR (400 MHz,  $CDCl_3$ )  $\delta$  9.46 (s, 1H), 7.81 (d,  $J = 7.8$  Hz, 1H), 7.50 (d,  $J = 8.5$  Hz, 2H), 7.36 (d,  $J = 7.5$  Hz, 2H), 7.22 (d,  $J = 7.8$  Hz, 2H), 7.09 (t,  $J = 7.8$  Hz, 1H);  $^{13}C$  NMR (100 MHz,  $CDCl_3$ )  $\delta$  165.7, 146.2, 133.1, 131.9, 131.3, 130.8, 128.8, 126.4 124.1, 121.4, 119.5 Anal. Calcd for  $C_{13}H_9ClN_2S$ : C, 59.88; H, 3.48; N, 10.74. Found: C, 59.91; H, 3.45; N, 10.71.

**4-(6-Nitrobenzo[d]thiazol-2-yl)morpholine (2k):** Yield 199 mg (75%). Yellow solid, m.p. 206-208°C, <sup>1</sup>H NMR (400 MHz, CDCl<sub>3</sub>) δ 8.57 (d, *J* = 2.2 Hz, 1H), 8.19 (dd, *J* = 9.2, 2.2 Hz, 1H), 7.45 (d, *J* = 9.2 Hz, 1H), 3.90 (t, *J* = 5.2 Hz, 4H), 3.66 (t, *J* = 5.4 Hz, 4H); <sup>13</sup>C NMR (100 MHz, CDCl<sub>3</sub>) δ 172.1, 157.6, 141.8, 130.7, 122.6, 118.2, 116.8, 66.3, 48.7. Anal. Calcd for C<sub>11</sub>H<sub>11</sub>N<sub>3</sub>O<sub>3</sub>S: C, 49.80; H, 4.18; N, 15.84. Found: C, 48.95; H, 4.17; N, 15.88.

**4-(6-Methoxybenzo[d]thiazol-2-yl)morpholine (2l):** Yield 238 mg (95%). Off white solid, m.p. 137-139°C, <sup>1</sup>H NMR (400 MHz, CDCl<sub>3</sub>) δ 7.46 (d, *J* = 9.3 Hz, 1H), 7.16 (d, *J* = 2.6 Hz, 1H), 6.94 (dd, *J* = 2.6, 2.5 Hz, 1H), 3.97 (t, *J* = 5.4 Hz, 4H), 3.86 (s, 3H), 3.55 (t, *J* = 5.4 Hz, 4H); <sup>13</sup>C NMR (100 MHz, CDCl<sub>3</sub>) δ 167.8, 155.4, 146.6, 131.8, 119.4, 113.1, 105.1, 67.1, 55.2, 48.2. Anal. Calcd for C<sub>12</sub>H<sub>14</sub>N<sub>2</sub>O<sub>2</sub>S: C, 57.58; H, 5.64; N, 11.19. Found: C, 57.63; H, 5.69; N, 11.34.

**2-Morpholinobenzo[d]thiazole-6-carbonitrile (2m):** Yield 196 mg (80%). White solid, m.p. 173-175 °C, <sup>1</sup>H NMR (400 MHz, CDCl<sub>3</sub>) δ 7.87 (s, 1H), 7.43 (s, 2H), 3.75 (t, *J* = 4.5 Hz, 4H), 3.49 (t, *J* = 4.8 Hz, 4H); <sup>13</sup>C NMR (100 MHz, CDCl<sub>3</sub>) δ 171.0, 162.3, 155.4, 133.5, 130.1, 125.3, 119.2, 103.9, 68.8, 48.3. Anal. Calcd for C<sub>12</sub>H<sub>11</sub>N<sub>3</sub>OS: C, 58.76; H, 4.52; N, 17.13. Found: C, 58.79; H, 4.58; N, 17.18.

**<sup>1</sup>H NMR (400 MHz, CDCl<sub>3</sub>) of compound 2a**

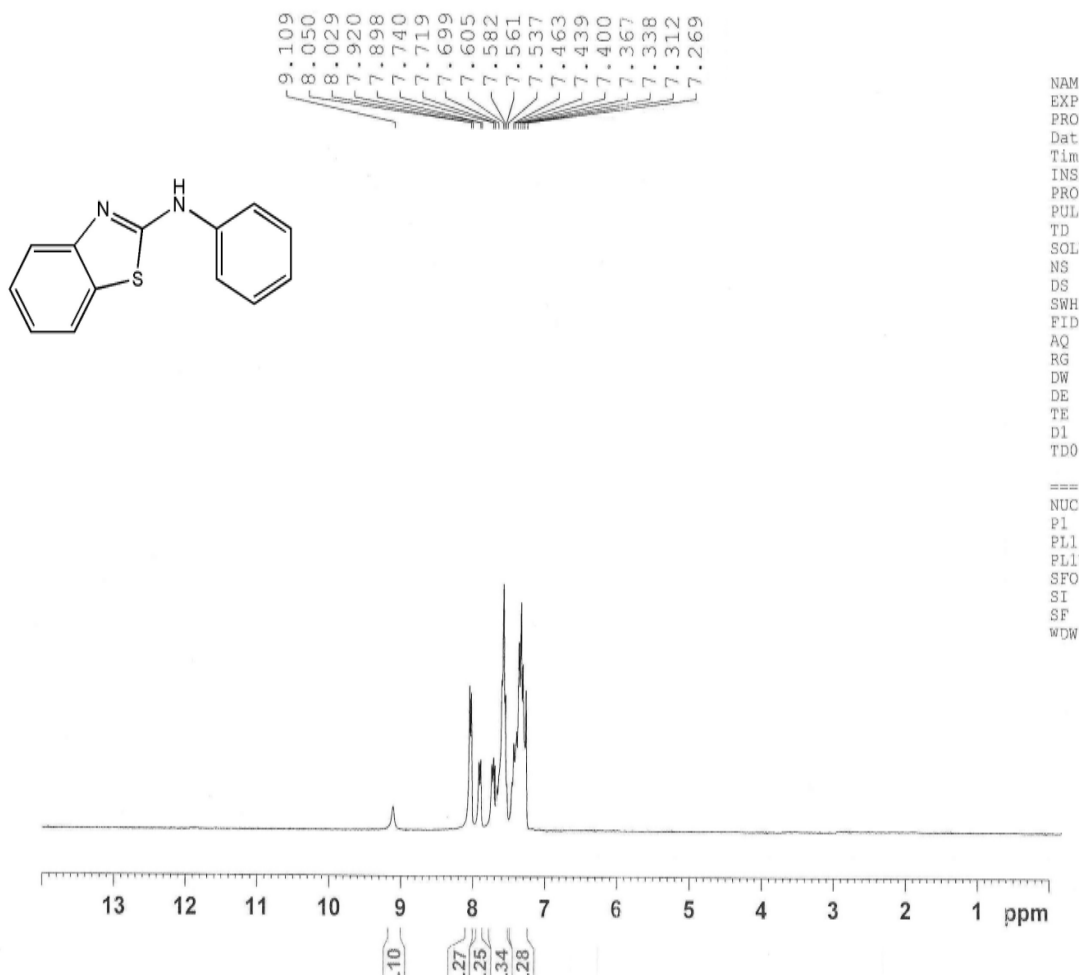

<sup>13</sup>C NMR (400 MHz, CDCl<sub>3</sub>) of compound 2a

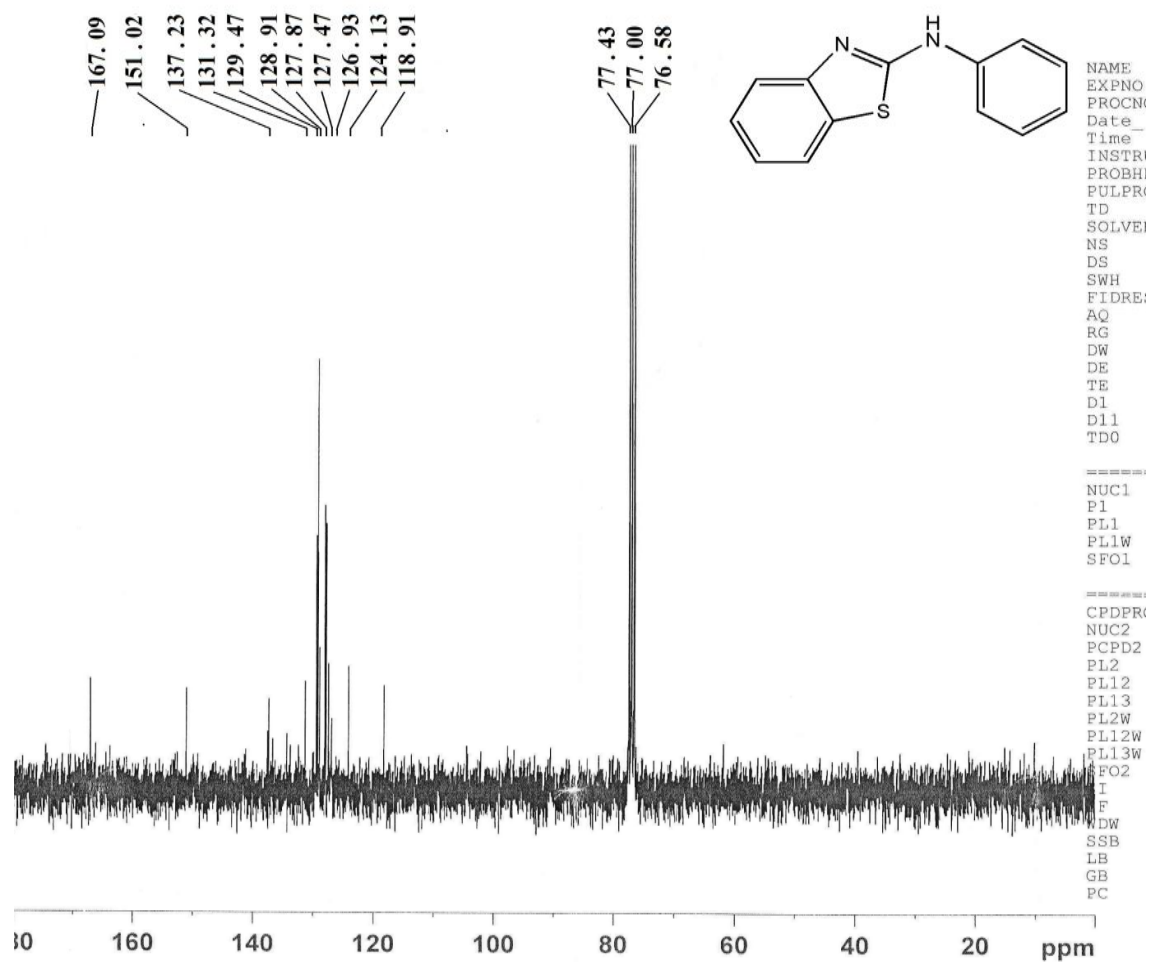

*<sup>1</sup>H NMR (400 MHz, CDCl<sub>3</sub>) of compound 2b*

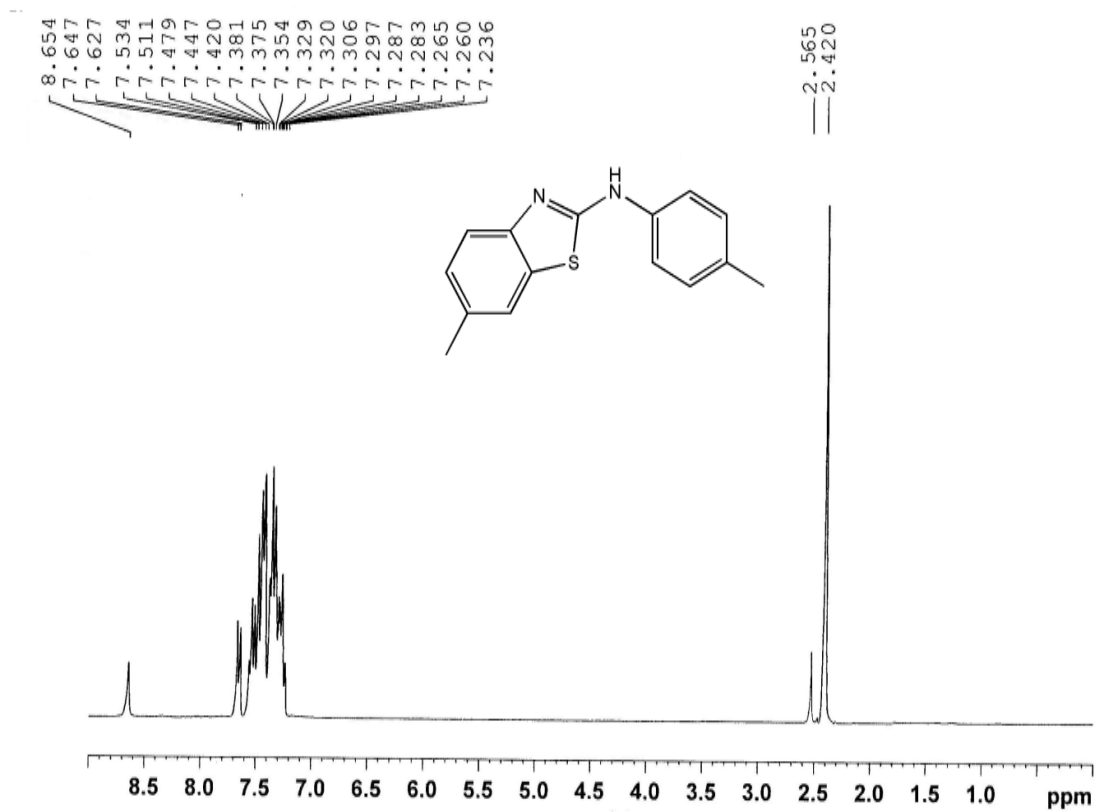



<sup>13</sup>C NMR (400 MHz, CDCl<sub>3</sub>) of compound 2b

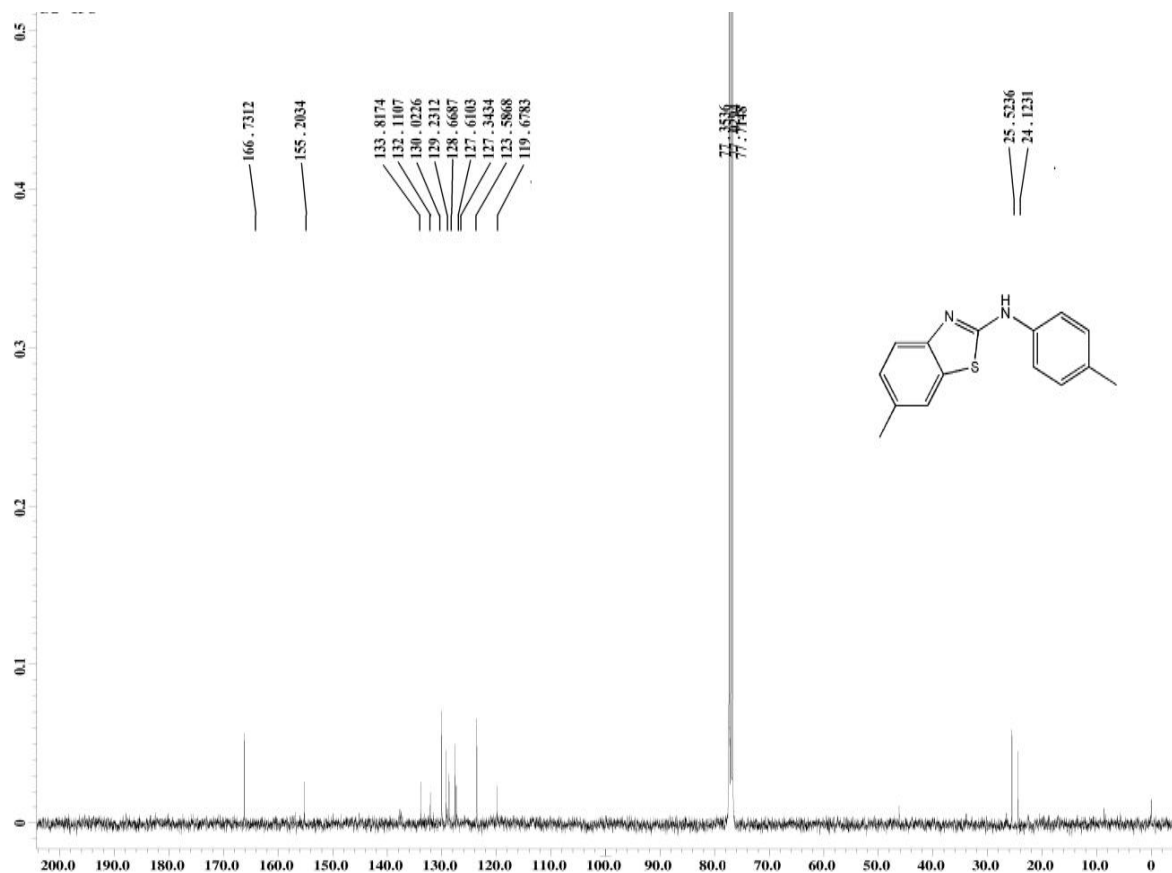

dc\_ba  
saxp  
trape  
zerof  
fft :  
mach  
ppm  
refer  
phase  
Deriv

Filen  
Autho  
Exper  
Sampl  
Solve  
Creat  
Revis  
Curre

Comme  
Data\_  
Dim\_s  
Dim\_t  
Dim\_u  
Dimen  
Site  
Spect

Field  
X\_acq  
X\_dom  
X\_fre  
X\_off  
X\_poi  
X\_pre  
X\_res  
X\_swe  
Irr\_d  
Irr\_f  
Irr\_o  
Clipp  
Mod\_r  
Scans  
Total

X\_90  
X\_acq  
X\_ang  
X\_atn  
X\_pul  
Irr\_s  
Irr\_a  
Irr\_n  
Decou  
Initi  
Noe  
Noe\_t  
Recvr  
Relax  
Repet  
Temp\_

<sup>1</sup>H NMR (400 MHz, CDCl<sub>3</sub>) of compound 2c

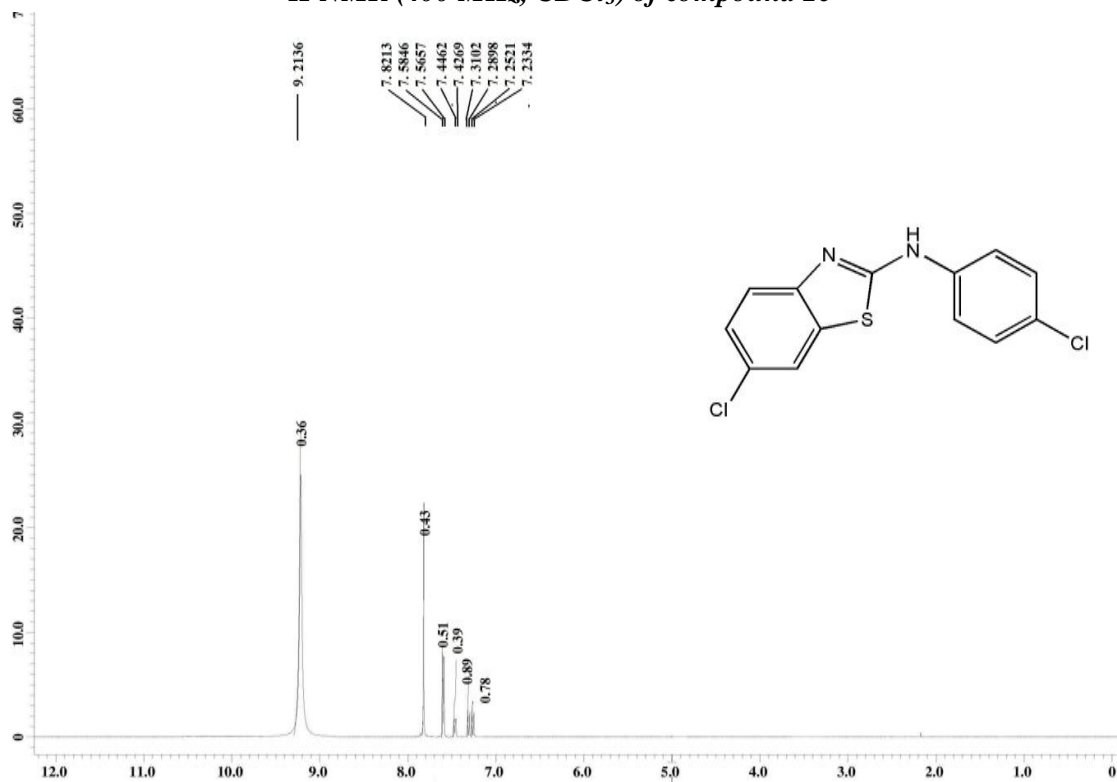

<sup>13</sup>C NMR (400 MHz, CDCl<sub>3</sub>) of compound 2c

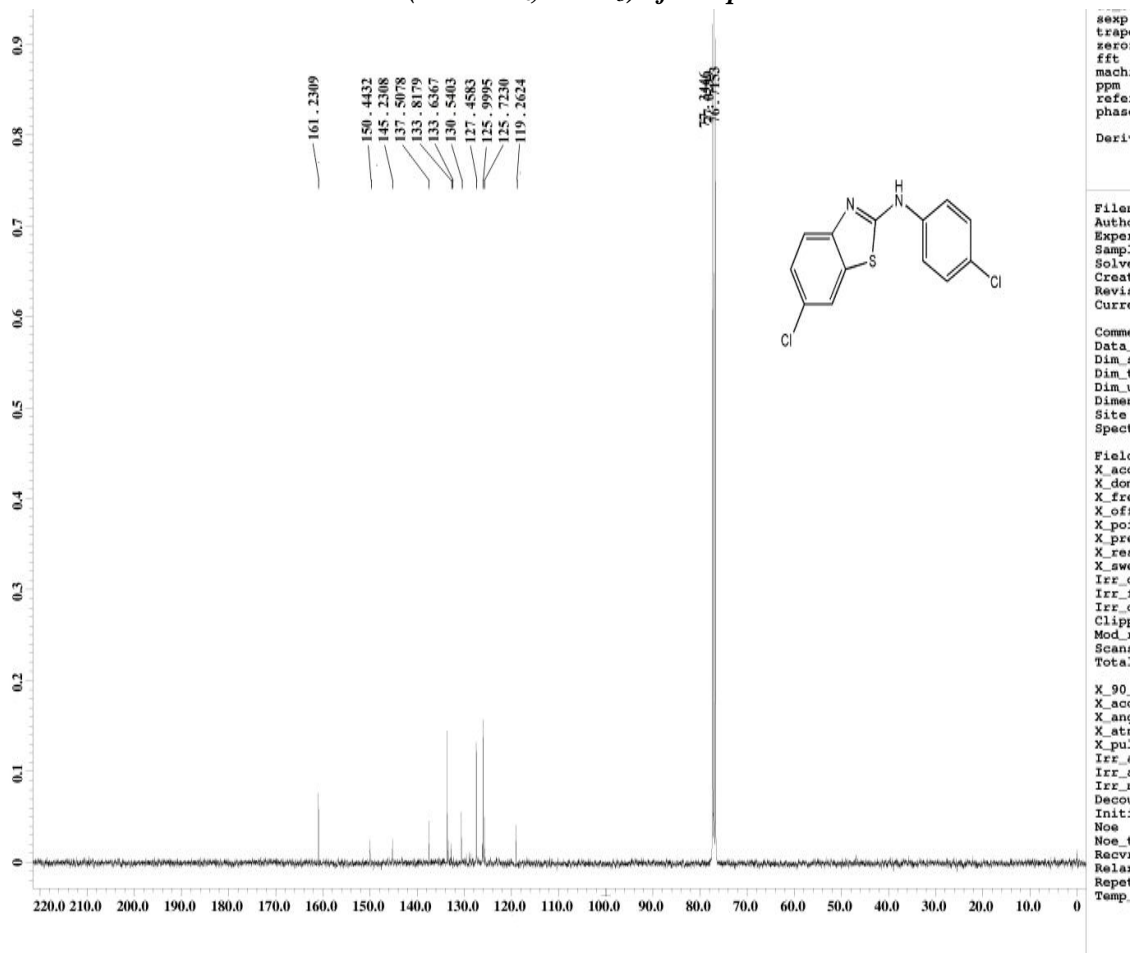

***<sup>1</sup>H NMR (400 MHz, CDCl<sub>3</sub>) of compound 2d***

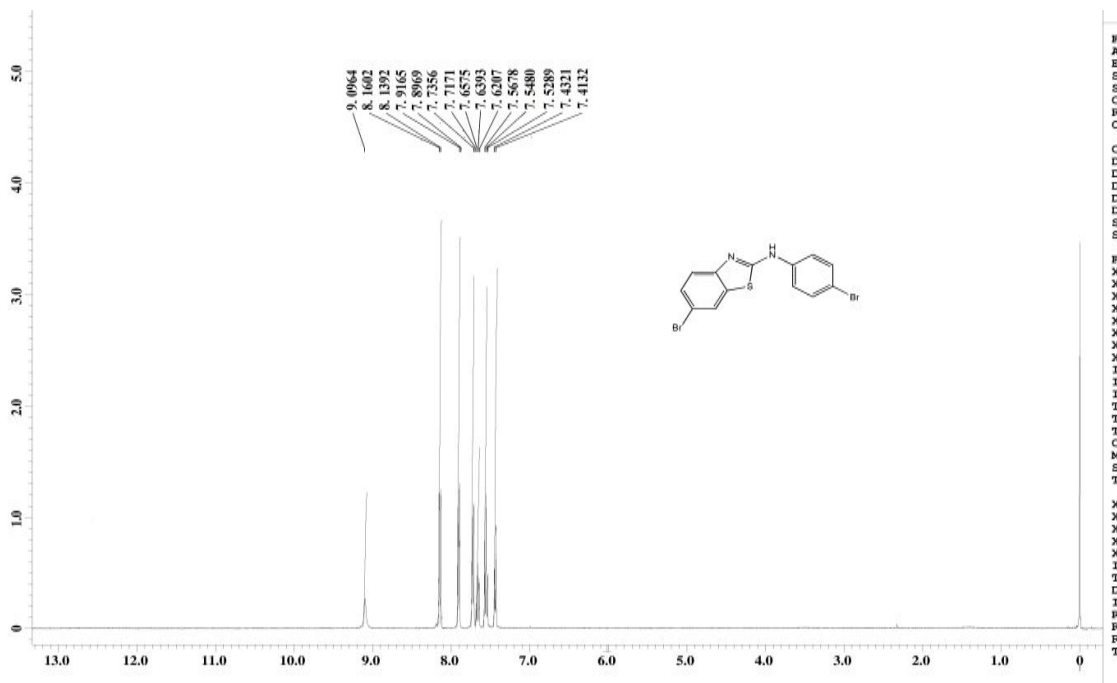

<sup>13</sup>C NMR (400 MHz, CDCl<sub>3</sub>) of compound 2d

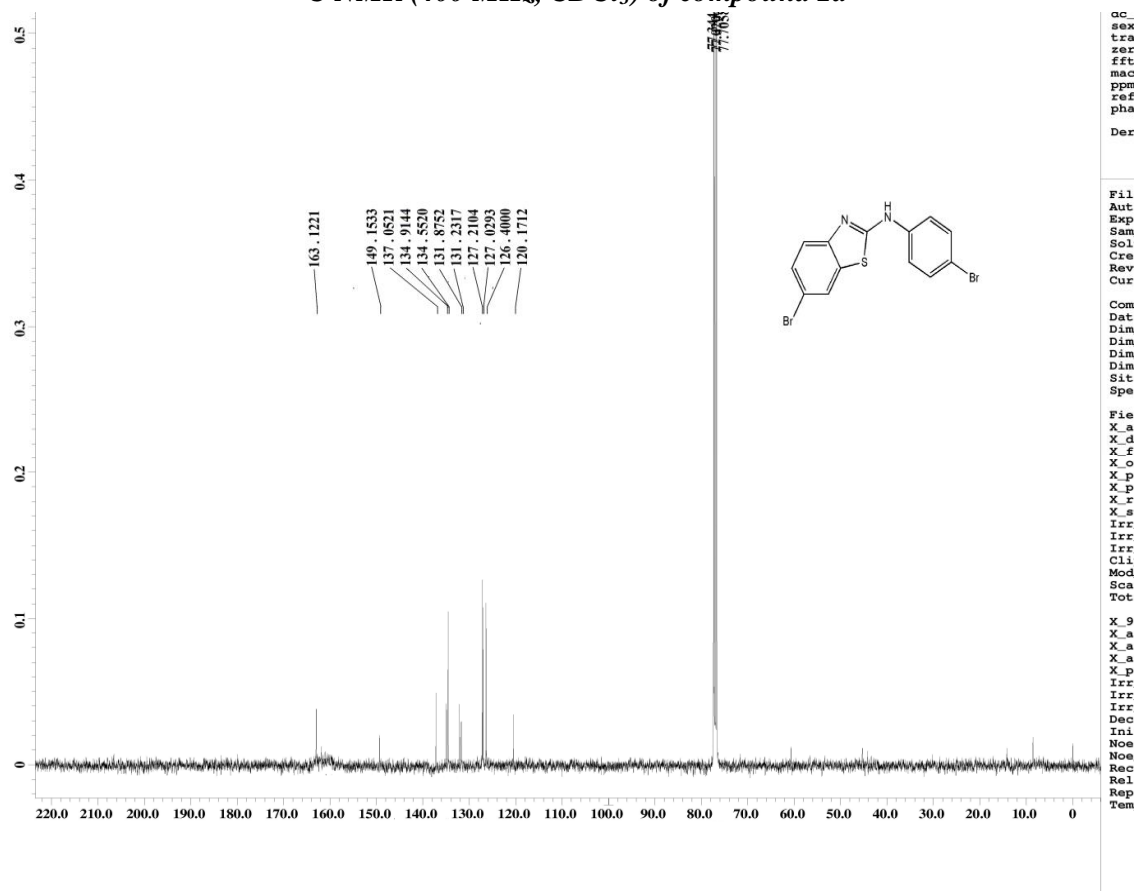

<sup>1</sup>H NMR (400 MHz, CDCl<sub>3</sub>) of compound 2e

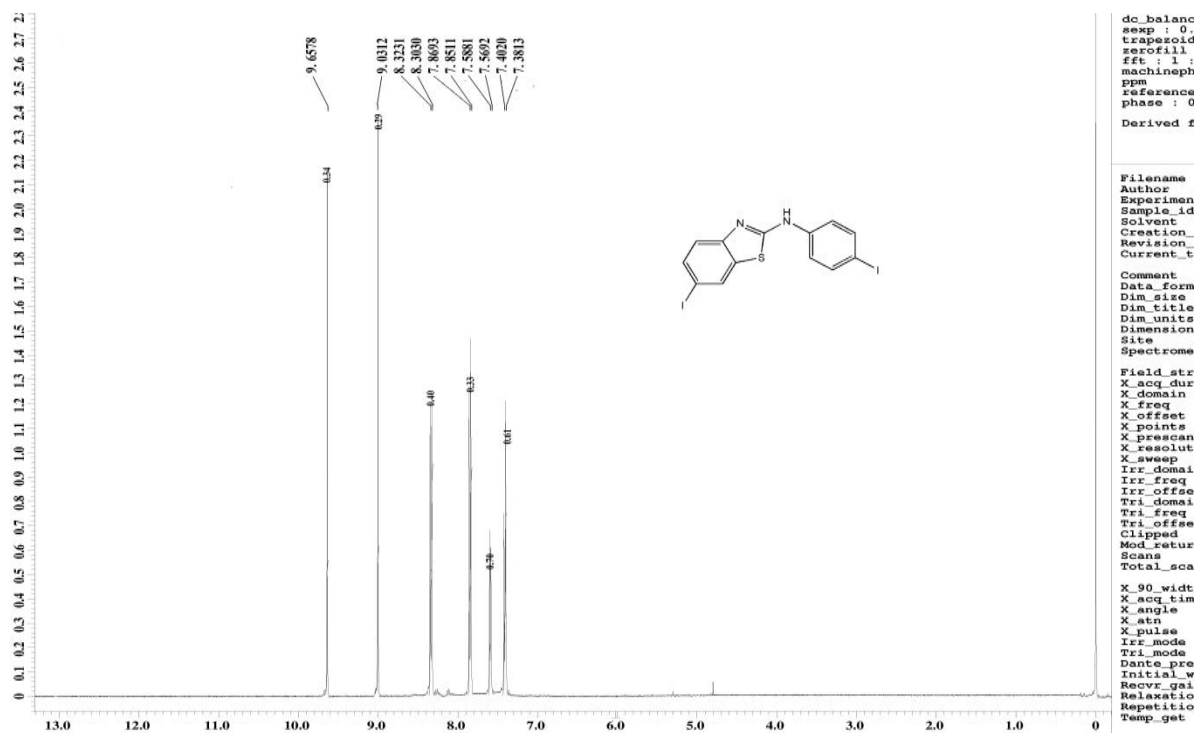

<sup>13</sup>C NMR (400 MHz, CDCl<sub>3</sub>) of compound 2e

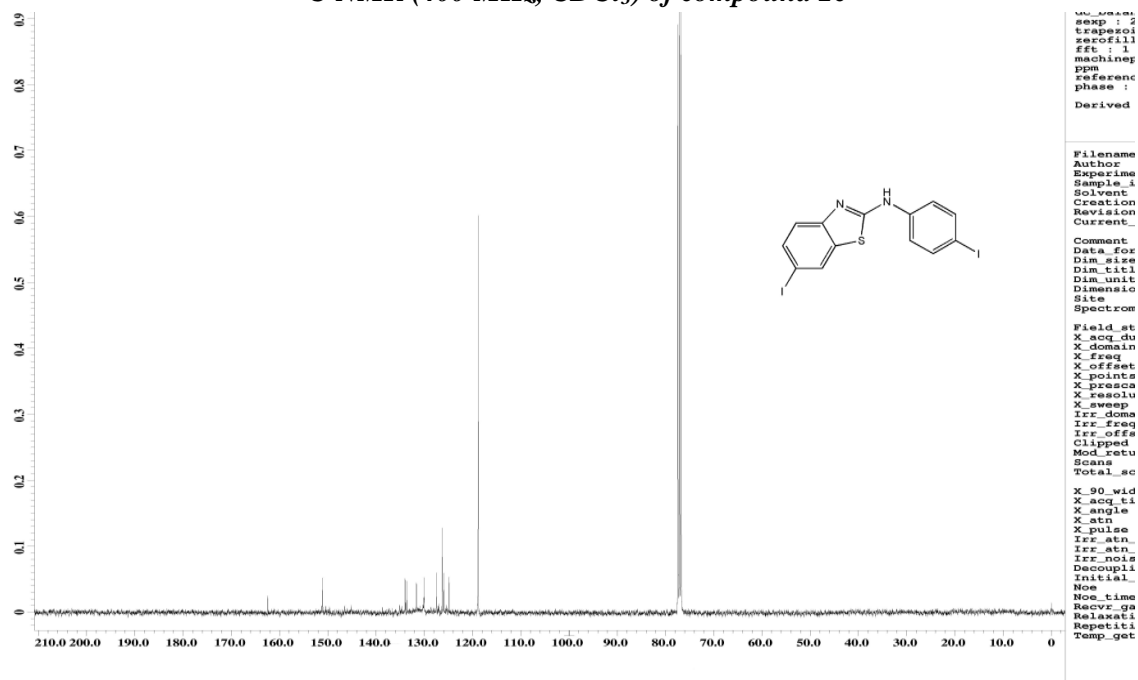

<sup>1</sup>H NMR (400 MHz, CDCl<sub>3</sub>) of compound 2f

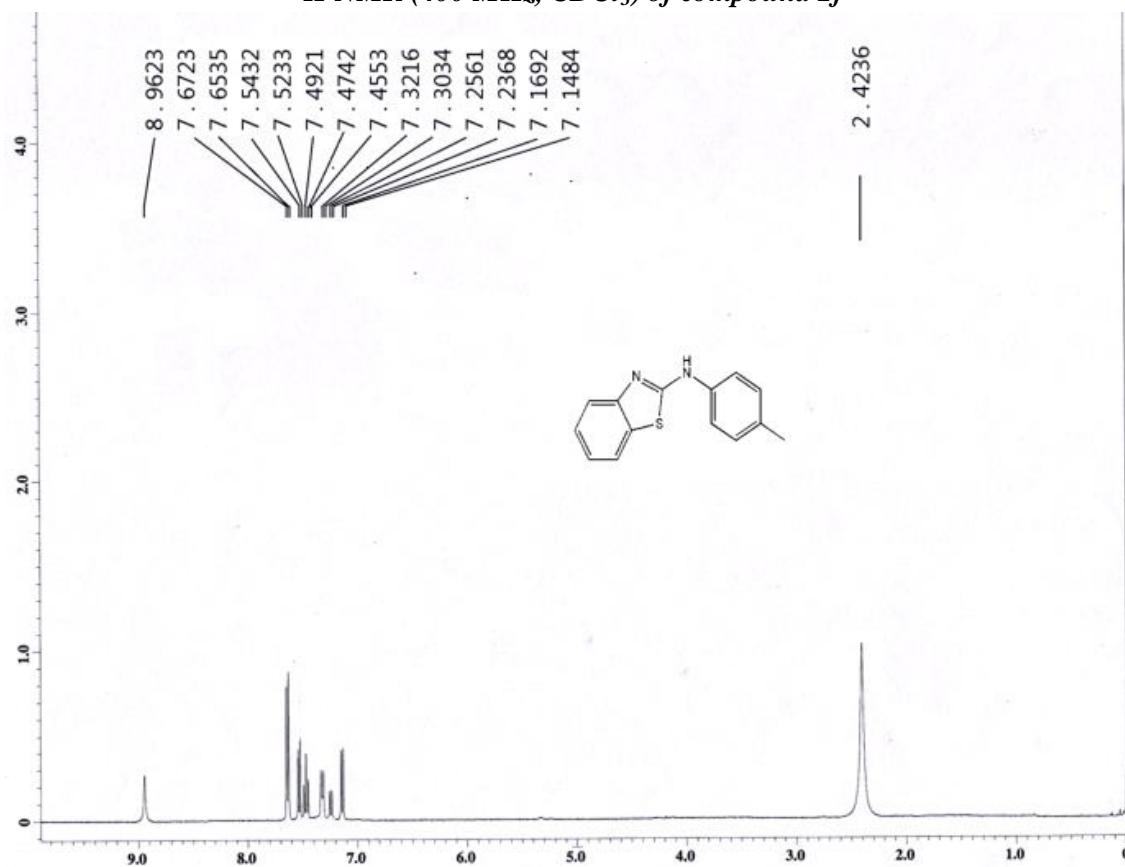



**<sup>1</sup>H NMR (400 MHz, CDCl<sub>3</sub>) of compound 2g**

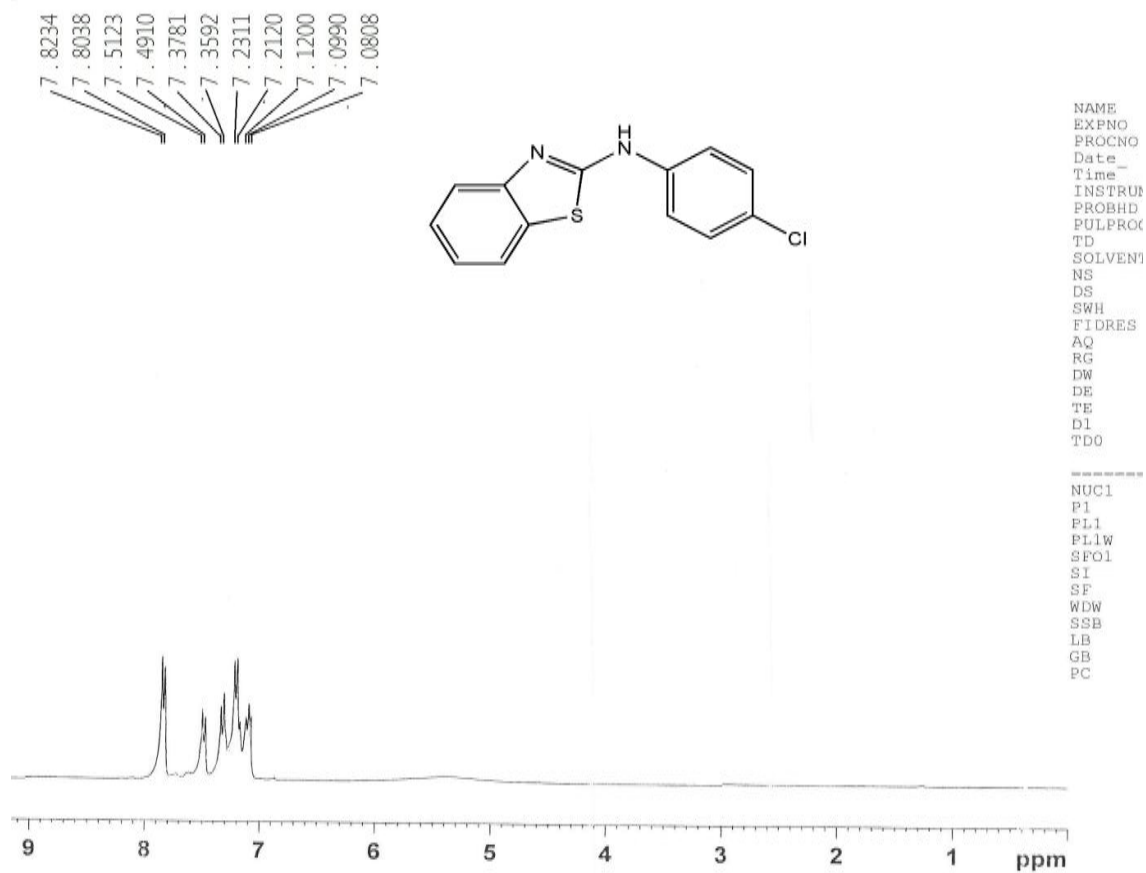

***<sup>1</sup>H NMR (400 MHz, CDCl<sub>3</sub>) of compound 2k***

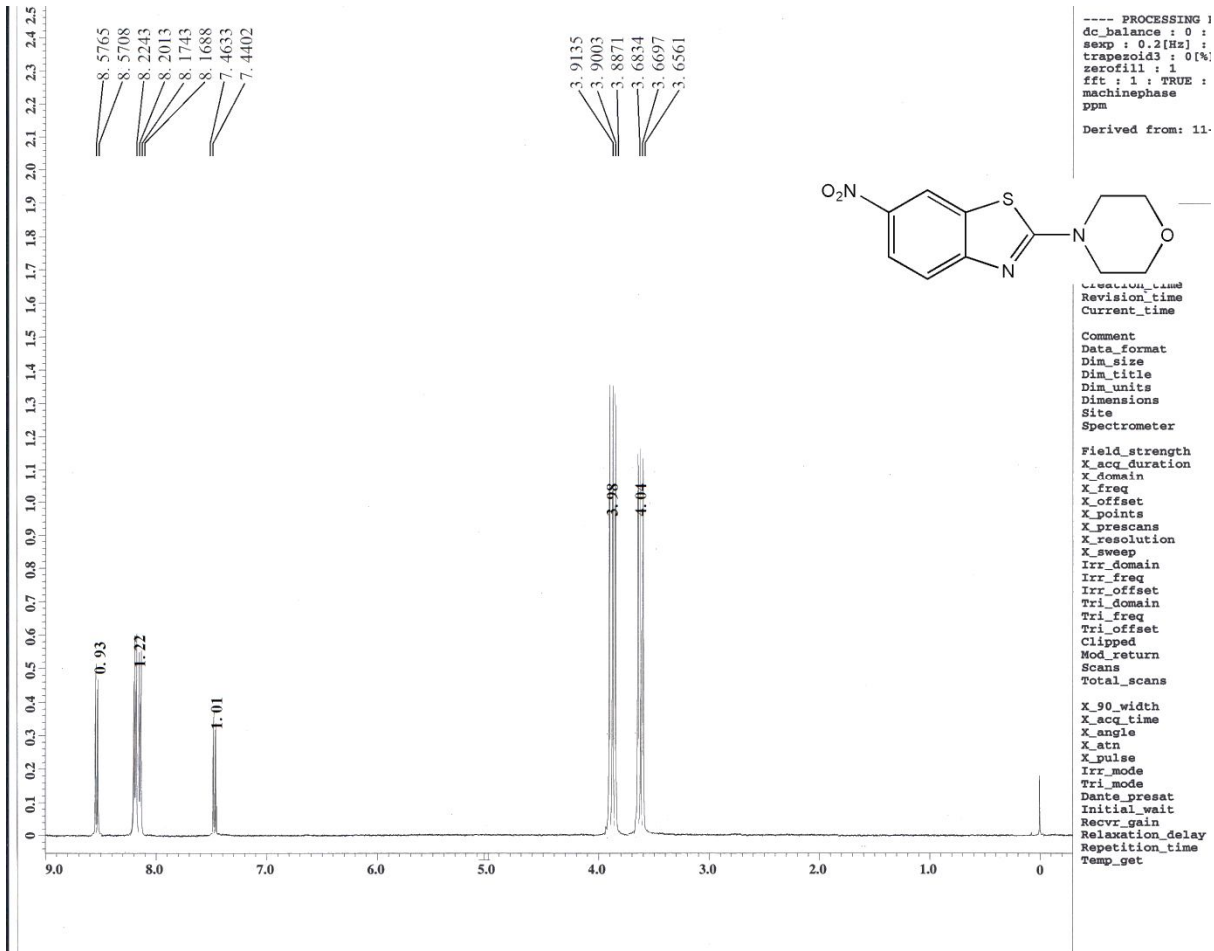

**$^{13}\text{C}$  NMR (400 MHz,  $\text{CDCl}_3$ ) of compound 2k**

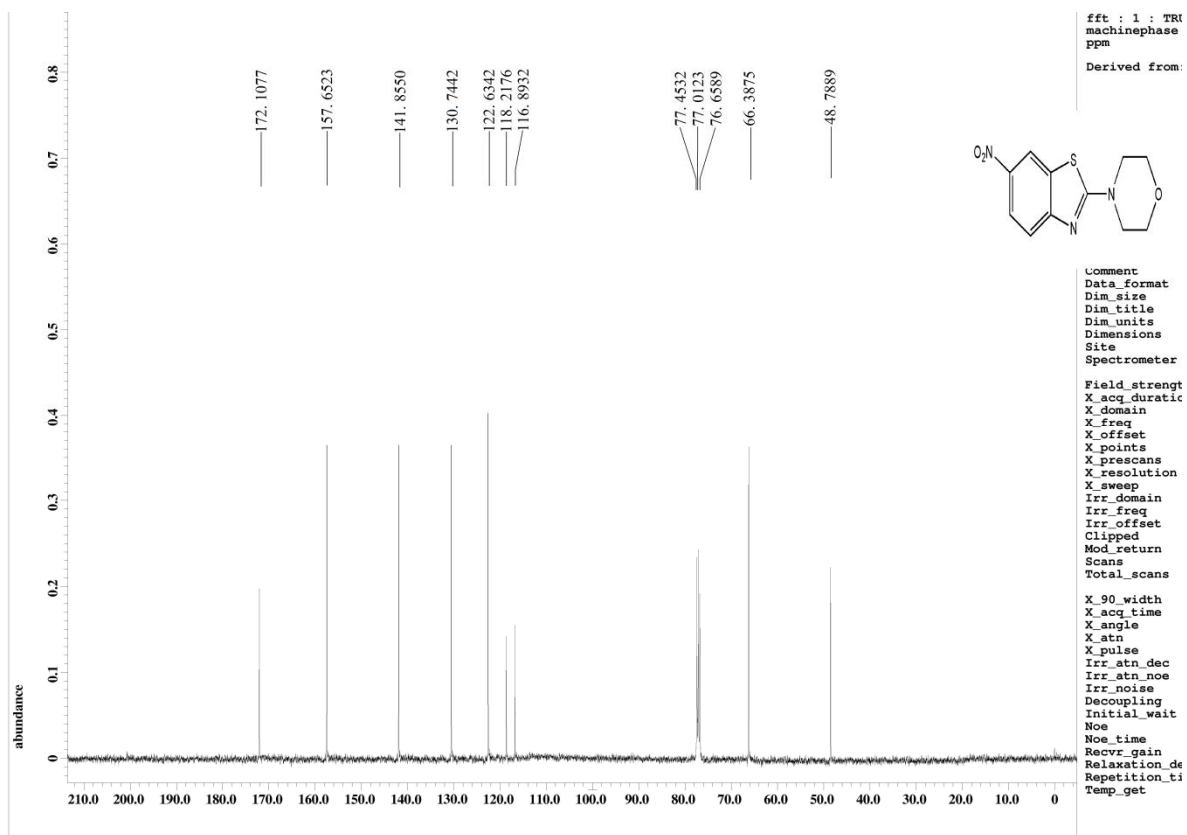

**<sup>1</sup>H NMR (400 MHz, CDCl<sub>3</sub>) of compound 2l**

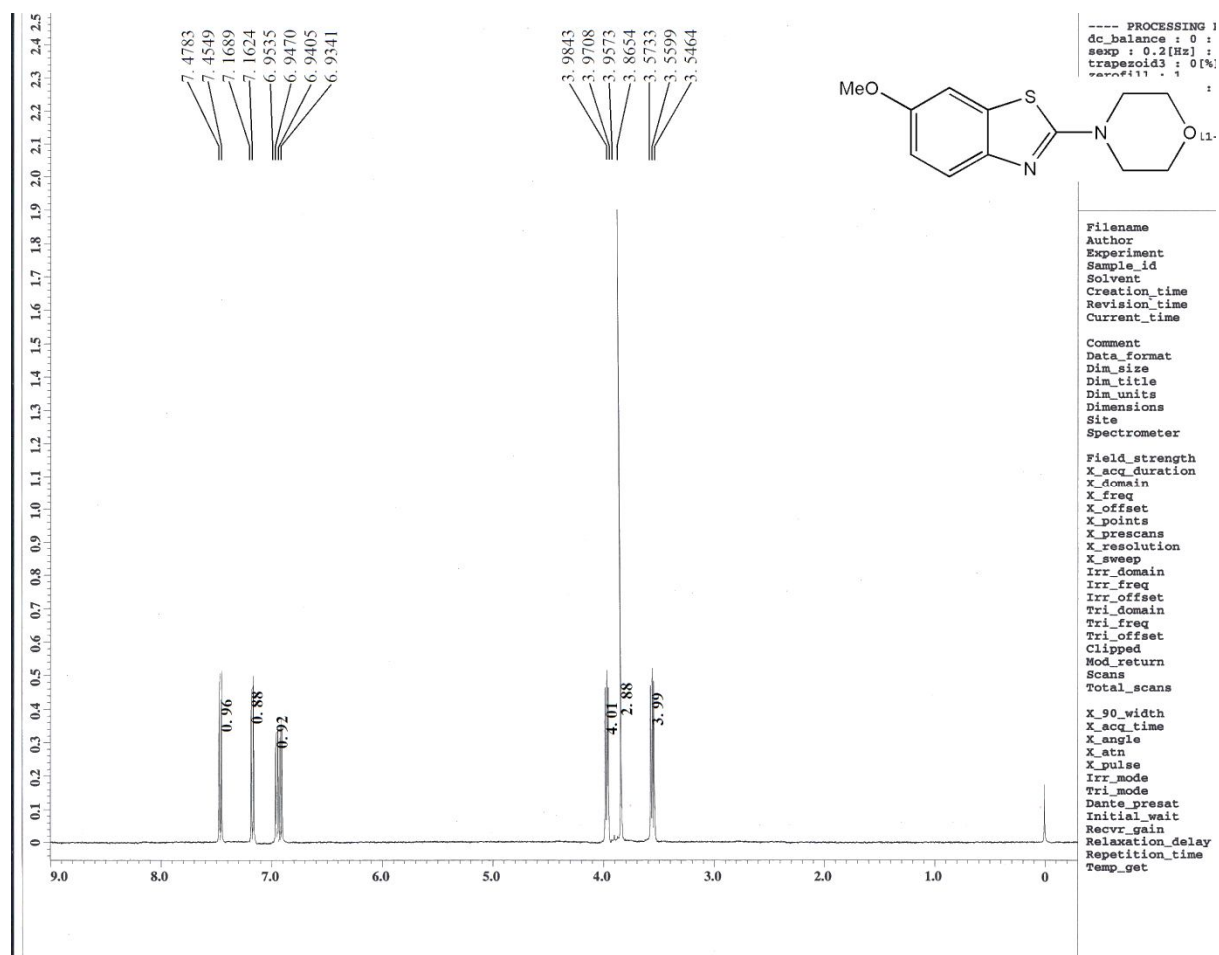

<sup>13</sup>C NMR (400 MHz, CDCl<sub>3</sub>) of compound 2l

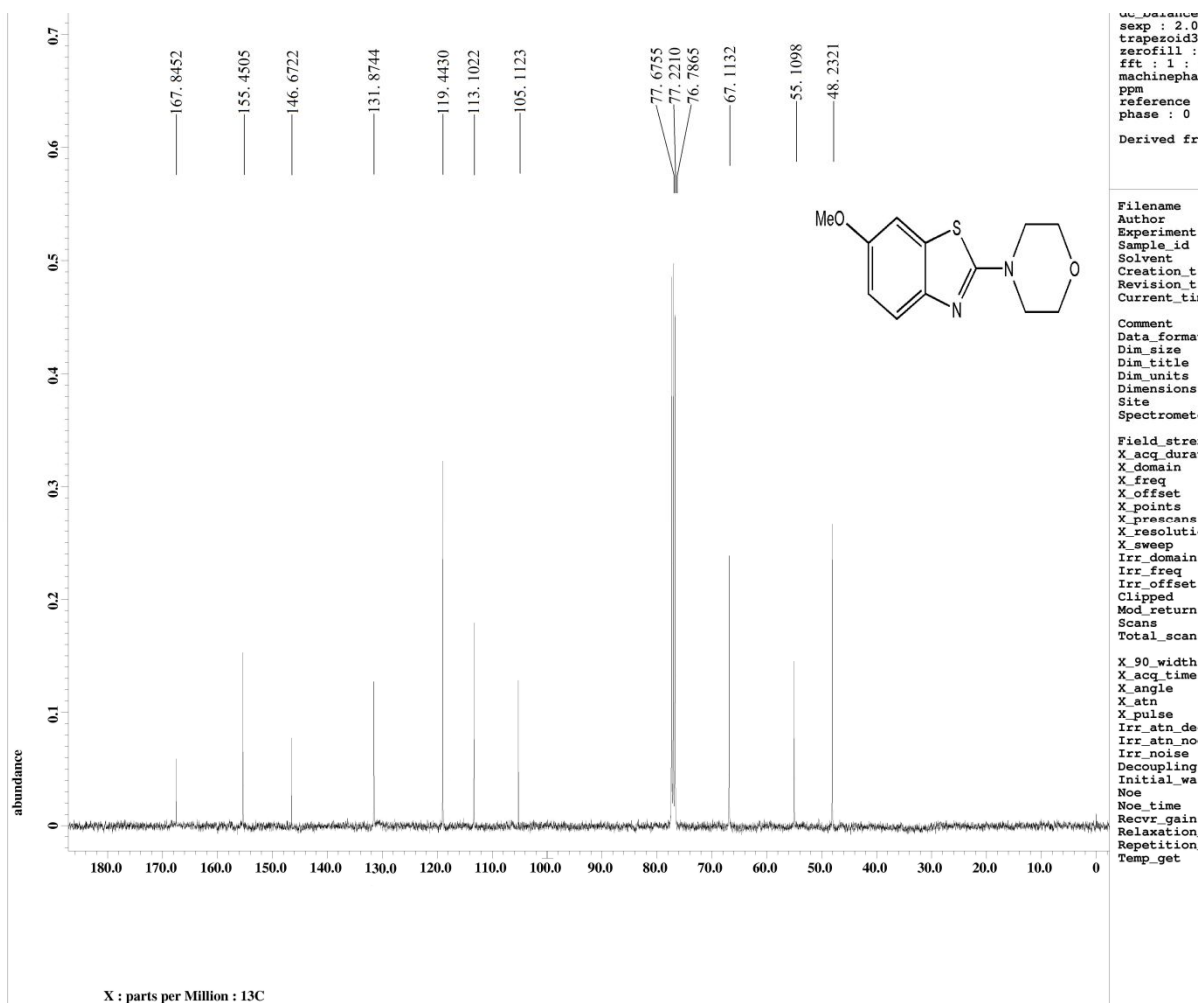

<sup>1</sup>H NMR (400 MHz, CDCl<sub>3</sub>) of compound 2m

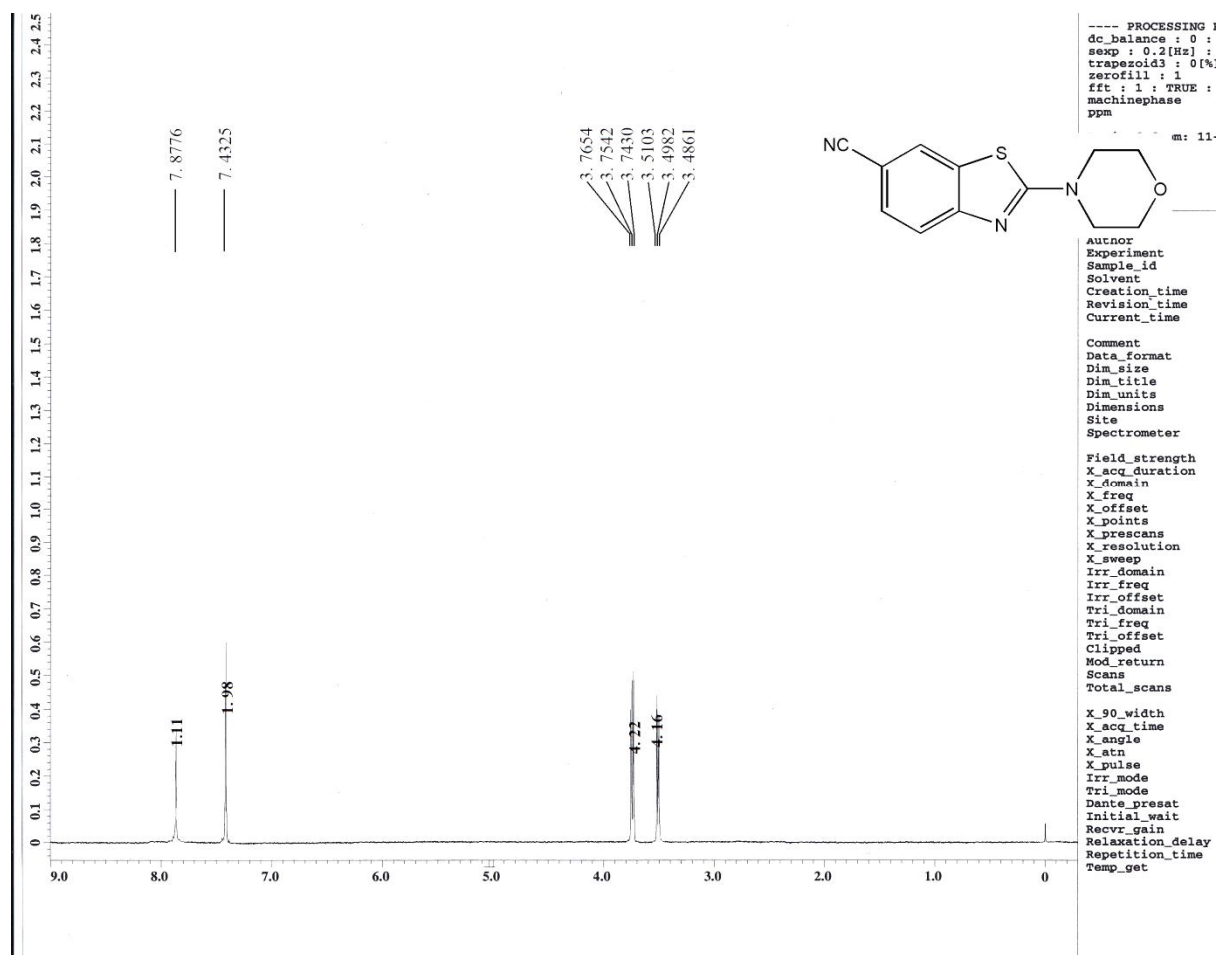

<sup>13</sup>C NMR (400 MHz, CDCl<sub>3</sub>) of compound 2m

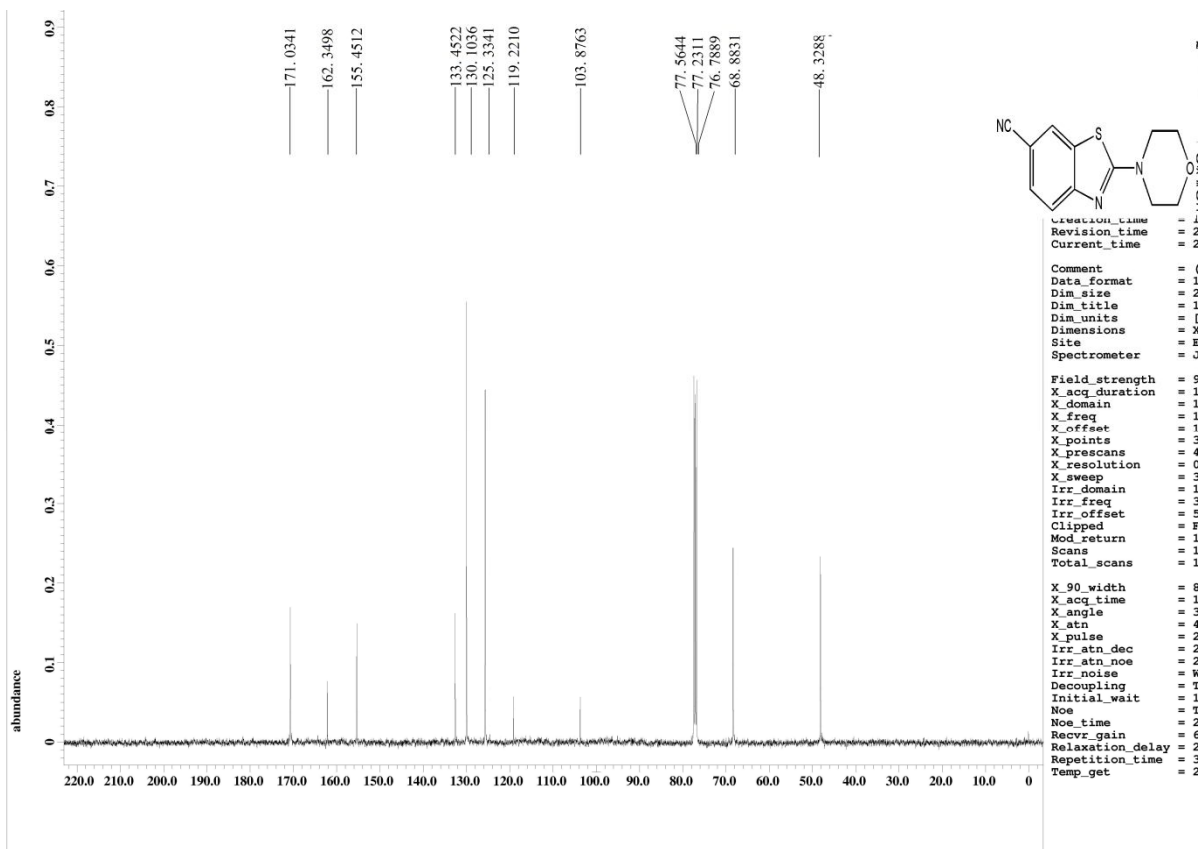

Supplement: c5ra10885c1.pdf [file c5ra10885c1.pdf]
